# Supplementary material
Source: publisher site journal article supplement (https://static.cambridge.org/content/id/urn:cambridge.org:id:article:S0016756821000376/resource/name/S0016756821000376supp001.docx)
Supplement: Supplementary file 1 [file S0016756821000376supp001.docx]

# Geological Magazine

Ediacaran initial subduction and Cambrian slab rollback of the Junggar Ocean: New evidence from plutons and gabbro enclave in West Junggar, NW China

Wen Liaoa, Bao-Fu Hana*, Yan Xua, Ang Lia

Supplementary Material

Supplementary Table S1. LA-ICP-MS U-Pb data of zircons from adakitic and non-adakitic rocks

| Supplementary Table S1 LA-ICP-MS U-Pb data of zircons from adakitic and non-adakitic rocks | | | | | | | | | | | | | | | | | | | | | | | | | |
| --- | --- | --- | --- | --- | --- | --- | --- | --- | --- | --- | --- | --- | --- | --- | --- | --- | --- | --- | --- | --- | --- | --- | --- | --- | --- |
| Spot number |  |  |  |  |  |  | Isotopic ratios | | | | |  |  | |  | Age（Ma） | | | | | | | |  |  |
| Th |  | U |  | Th/U |  | 207Pb/206Pb | |  | 207Pb/235U | |  | 206Pb/238U | |  | 207Pb/206Pb | |  | 207Pb/235U | |  | 206Pb/238U | |  | Con. |
| ppm |  | ppm |  |  |  | Ratio | 1σ |  | Ratio | 1σ |  | Ratio | 1σ |  | Age | 1σ |  | Age | 1σ |  | Age | 1σ |  | % |
| 190621-01 | | | | | | | | | | | | | | | | | | | | | | | | | |
| 1 | 865 |  | 909 |  | 0.95 |  | 0.0584 | 0.0013 |  | 0.7206 | 0.0164 |  | 0.0891 | 0.0012 |  | 546 | 48 |  | 551 | 10 |  | 550 | 7 |  | 99 |
| 2 | 1282 |  | 1253 |  | 1.02 |  | 0.0586 | 0.0011 |  | 0.7233 | 0.0182 |  | 0.0892 | 0.0017 |  | 550 | 41 |  | 553 | 11 |  | 551 | 6 |  | 99 |
| 3 | 634 |  | 742 |  | 0.85 |  | 0.0579 | 0.0013 |  | 0.7195 | 0.0253 |  | 0.0894 | 0.0018 |  | 528 | 50 |  | 550 | 15 |  | 552 | 9 |  | 99 |
| 4 | 168 |  | 237 |  | 0.71 |  | 0.0582 | 0.0052 |  | 0.7140 | 0.0593 |  | 0.0889 | 0.0016 |  | 539 | 96 |  | 547 | 35 |  | 549 | 10 |  | 99 |
| 5 | 600 |  | 744 |  | 0.81 |  | 0.0583 | 0.0018 |  | 0.7159 | 0.0231 |  | 0.0887 | 0.0010 |  | 539 | 67 |  | 548 | 14 |  | 548 | 6 |  | 99 |
| 6 | 516 |  | 630 |  | 0.82 |  | 0.0578 | 0.0015 |  | 0.7110 | 0.0178 |  | 0.0891 | 0.0011 |  | 520 | 56 |  | 545 | 11 |  | 550 | 7 |  | 99 |
| 7 | 1465 |  | 1462 |  | 1.00 |  | 0.0571 | 0.0010 |  | 0.7042 | 0.0149 |  | 0.0891 | 0.0012 |  | 494 | 71 |  | 541 | 9 |  | 551 | 7 |  | 98 |
| 8 | 823 |  | 898 |  | 0.92 |  | 0.0590 | 0.0015 |  | 0.6766 | 0.0180 |  | 0.0829 | 0.0008 |  | 569 | 49 |  | 525 | 11 |  | 513 | 5 |  | 97 |
| 9 | 1411 |  | 1025 |  | 1.38 |  | 0.0589 | 0.0018 |  | 0.7430 | 0.0207 |  | 0.0926 | 0.0021 |  | 565 | 65 |  | 564 | 12 |  | 571 | 12 |  | 98 |
| 10 | 649 |  | 750 |  | 0.86 |  | 0.0578 | 0.0013 |  | 0.7125 | 0.0186 |  | 0.0891 | 0.0011 |  | 524 | 50 |  | 546 | 11 |  | 550 | 7 |  | 99 |
| 11 | 1467 |  | 1452 |  | 1.01 |  | 0.0585 | 0.0015 |  | 0.7489 | 0.0170 |  | 0.0927 | 0.0007 |  | 569 | 53 |  | 570 | 10 |  | 570 | 8 |  | 98 |
| 12 | 744 |  | 836 |  | 0.89 |  | 0.0561 | 0.0020 |  | 0.6832 | 0.0239 |  | 0.0882 | 0.0008 |  | 454 | 78 |  | 529 | 14 |  | 545 | 5 |  | 96 |
| 13 | 532 |  | 672 |  | 0.79 |  | 0.0565 | 0.0014 |  | 0.6967 | 0.0240 |  | 0.0892 | 0.0021 |  | 472 | 56 |  | 537 | 14 |  | 551 | 7 |  | 97 |
| 14 | 227 |  | 313 |  | 0.73 |  | 0.0582 | 0.0017 |  | 0.7177 | 0.0249 |  | 0.0892 | 0.0014 |  | 600 | 60 |  | 549 | 15 |  | 551 | 8 |  | 99 |
| 15 | 851 |  | 966 |  | 0.88 |  | 0.0583 | 0.0013 |  | 0.6675 | 0.0149 |  | 0.0830 | 0.0007 |  | 539 | 44 |  | 519 | 9 |  | 514 | 4 |  | 98 |
| 16 | 248 |  | 388 |  | 0.64 |  | 0.0572 | 0.0019 |  | 0.7009 | 0.0211 |  | 0.0891 | 0.0012 |  | 502 | 69 |  | 539 | 13 |  | 550 | 7 |  | 98 |
| 17 | 732 |  | 825 |  | 0.89 |  | 0.0586 | 0.0013 |  | 0.7225 | 0.0200 |  | 0.0892 | 0.0013 |  | 550 | 55 |  | 552 | 12 |  | 551 | 8 |  | 99 |
| 18 | 238 |  | 384 |  | 0.62 |  | 0.0594 | 0.0024 |  | 0.7322 | 0.0298 |  | 0.0891 | 0.0011 |  | 589 | 82 |  | 558 | 17 |  | 550 | 7 |  | 98 |
| ~~19~~ | ~~522~~ |  | ~~559~~ |  | ~~0.93~~ |  | ~~0.0569~~ | ~~0.0019~~ |  | ~~0.6848~~ | ~~0.0149~~ |  | ~~0.0832~~ | ~~0.0006~~ |  | ~~1120~~ | ~~77~~ |  | ~~524~~ | ~~19~~ |  | ~~515~~ | ~~10~~ |  | ~~77~~ |
| 20 | 368 |  | 427 |  | 0.86 |  | 0.0637 | 0.0023 |  | 0.7255 | 0.0326 |  | 0.0890 | 0.0020 |  | 731 | 76 |  | 589 | 19 |  | 549 | 8 |  | 96 |
| 21 | 120 |  | 164 |  | 0.73 |  | 0.0568 | 0.0017 |  | 0.0367 | 0.0265 |  | 0.0937 | 0.0024 |  | 646 | 84 |  | 573 | 33 |  | 565 | 11 |  | 99 |
| 22 | 657 |  | 759 |  | 0.86 |  | 0.0575 | 0.0015 |  | 0.7124 | 0.0200 |  | 0.0892 | 0.0010 |  | 522 | 57 |  | 546 | 12 |  | 551 | 6 |  | 99 |
| 190624-01 | | | | | | | | | | | | | | | | | | | | | | | | | |
| 1 | 76 |  | 194 |  | 0.39 |  | 0.0546 | 0.0022 |  | 0.6444 | 0.0297 |  | 0.0850 | 0.0015 |  | 398 | 89 |  | 505 | 18 |  | 526 | 9 |  | 95 |
| 2 | 38 |  | 103 |  | 0.37 |  | 0.0569 | 0.0061 |  | 0.6634 | 0.0710 |  | 0.0850 | 0.0026 |  | 487 | 117 |  | 517 | 43 |  | 526 | 9 |  | 98 |
| 3 | 161 |  | 261 |  | 0.62 |  | 0.0565 | 0.0022 |  | 0.6623 | 0.0263 |  | 0.0848 | 0.0016 |  | 472 | 92 |  | 516 | 16 |  | 525 | 9 |  | 98 |
| 4 | 170 |  | 290 |  | 0.58 |  | 0.0574 | 0.0019 |  | 0.6736 | 0.0235 |  | 0.0847 | 0.0016 |  | 509 | 70 |  | 523 | 14 |  | 524 | 9 |  | 99 |
| 5 | 106 |  | 182 |  | 0.58 |  | 0.0564 | 0.0028 |  | 0.6533 | 0.0303 |  | 0.0848 | 0.0016 |  | 465 | 111 |  | 511 | 19 |  | 525 | 10 |  | 97 |
| 6 | 122 |  | 256 |  | 0.48 |  | 0.0565 | 0.0020 |  | 0.6623 | 0.0240 |  | 0.0847 | 0.0015 |  | 472 | 78 |  | 516 | 15 |  | 524 | 9 |  | 98 |
| 7 | 80 |  | 194 |  | 0.41 |  | 0.0573 | 0.0035 |  | 0.6730 | 0.0401 |  | 0.0849 | 0.0013 |  | 502 | 75 |  | 523 | 24 |  | 526 | 8 |  | 99 |
| 8 | 474 |  | 1394 |  | 0.34 |  | 0.0577 | 0.0013 |  | 0.6860 | 0.0223 |  | 0.0850 | 0.0018 |  | 517 | 45 |  | 530 | 13 |  | 526 | 11 |  | 99 |
| 9 | 116 |  | 228 |  | 0.51 |  | 0.0596 | 0.0040 |  | 0.6609 | 0.0520 |  | 0.0847 | 0.0058 |  | 591 | 88 |  | 515 | 32 |  | 524 | 10 |  | 98 |
| 10 | 85 |  | 220 |  | 0.39 |  | 0.0595 | 0.0028 |  | 0.7036 | 0.0366 |  | 0.0849 | 0.0019 |  | 583 | 102 |  | 541 | 22 |  | 525 | 9 |  | 97 |
| 11 | 1334 |  | 2198 |  | 0.61 |  | 0.0572 | 0.0015 |  | 0.6741 | 0.0255 |  | 0.0848 | 0.0023 |  | 502 | 62 |  | 523 | 15 |  | 524 | 11 |  | 99 |
| 12 | 179 |  | 367 |  | 0.49 |  | 0.0556 | 0.0029 |  | 0.6504 | 0.0340 |  | 0.0844 | 0.0027 |  | 439 | 107 |  | 509 | 21 |  | 523 | 8 |  | 97 |
| 13 | 88 |  | 238 |  | 0.37 |  | 0.0571 | 0.0032 |  | 0.6809 | 0.0531 |  | 0.0847 | 0.0027 |  | 498 | 96 |  | 527 | 32 |  | 524 | 10 |  | 99 |
| 14 | 224 |  | 303 |  | 0.74 |  | 0.0558 | 0.0020 |  | 0.6603 | 0.0289 |  | 0.0849 | 0.0019 |  | 443 | 80 |  | 515 | 18 |  | 525 | 7 |  | 97 |
| 15 | 154 |  | 304 |  | 0.51 |  | 0.0606 | 0.0040 |  | 0.7015 | 0.0753 |  | 0.0845 | 0.0053 |  | 633 | 104 |  | 540 | 45 |  | 523 | 11 |  | 96 |
| 16 | 289 |  | 681 |  | 0.42 |  | 0.0561 | 0.0013 |  | 0.6841 | 0.0199 |  | 0.0876 | 0.0014 |  | 454 | 19 |  | 529 | 12 |  | 541 | 9 |  | 97 |
| 17 | 107 |  | 222 |  | 0.48 |  | 0.0580 | 0.0023 |  | 0.6824 | 0.0282 |  | 0.0848 | 0.0013 |  | 528 | 87 |  | 528 | 17 |  | 525 | 8 |  | 99 |
| 18 | 126 |  | 253 |  | 0.50 |  | 0.0593 | 0.0023 |  | 0.7006 | 0.0336 |  | 0.0846 | 0.0022 |  | 589 | 81 |  | 539 | 20 |  | 524 | 9 |  | 97 |
| 19 | 127 |  | 250 |  | 0.51 |  | 0.0589 | 0.0033 |  | 0.6912 | 0.0371 |  | 0.0847 | 0.0014 |  | 565 | 102 |  | 534 | 22 |  | 524 | 8 |  | 98 |
| 20 | 1085 |  | 1678 |  | 0.65 |  | 0.0562 | 0.0012 |  | 0.6623 | 0.0157 |  | 0.0849 | 0.0013 |  | 461 | 46 |  | 516 | 10 |  | 525 | 8 |  | 98 |
| 190625-01 | | | | | | | | | | | | | | | | | | | | | | | | | |
| 1 | 120 |  | 313 |  | 0.38 |  | 0.0581 | 0.0021 |  | 0.6845 | 0.0266 |  | 0.0854 | 0.0012 |  | 532 | 80 |  | 530 | 16 |  | 528 | 7 |  | 99 |
| 2 | 66 |  | 170 |  | 0.39 |  | 0.0573 | 0.0028 |  | 0.6737 | 0.0323 |  | 0.0856 | 0.0019 |  | 506 | 106 |  | 523 | 20 |  | 529 | 11 |  | 98 |
| 3 | 120 |  | 220 |  | 0.54 |  | 0.0582 | 0.0021 |  | 0.6873 | 0.0255 |  | 0.0857 | 0.0012 |  | 600 | 78 |  | 531 | 15 |  | 530 | 7 |  | 99 |
| 4 | 58 |  | 170 |  | 0.34 |  | 0.0599 | 0.0020 |  | 0.7061 | 0.0281 |  | 0.0853 | 0.0014 |  | 598 | 105 |  | 542 | 17 |  | 528 | 9 |  | 97 |
| 5 | 61 |  | 141 |  | 0.43 |  | 0.0557 | 0.0028 |  | 0.6540 | 0.0334 |  | 0.0852 | 0.0019 |  | 439 | 109 |  | 511 | 21 |  | 527 | 11 |  | 96 |
| 6 | 142 |  | 222 |  | 0.64 |  | 0.0568 | 0.0028 |  | 0.6688 | 0.0330 |  | 0.0855 | 0.0017 |  | 483 | 109 |  | 520 | 20 |  | 529 | 10 |  | 98 |
| 7 | 50 |  | 129 |  | 0.39 |  | 0.0559 | 0.0024 |  | 0.6530 | 0.0269 |  | 0.0855 | 0.0018 |  | 450 | 96 |  | 510 | 17 |  | 529 | 11 |  | 96 |
| 8 | 44 |  | 121 |  | 0.37 |  | 0.0597 | 0.0033 |  | 0.6996 | 0.0386 |  | 0.0853 | 0.0018 |  | 591 | 114 |  | 539 | 23 |  | 528 | 11 |  | 98 |
| 9 | 98 |  | 213 |  | 0.46 |  | 0.0572 | 0.0020 |  | 0.6750 | 0.0238 |  | 0.0855 | 0.0011 |  | 498 | 76 |  | 524 | 14 |  | 529 | 7 |  | 99 |
| 10 | 109 |  | 230 |  | 0.48 |  | 0.0575 | 0.0021 |  | 0.6793 | 0.0250 |  | 0.0855 | 0.0013 |  | 522 | 81 |  | 526 | 15 |  | 529 | 8 |  | 99 |
| 11 | 67 |  | 176 |  | 0.38 |  | 0.0574 | 0.0028 |  | 0.6760 | 0.0314 |  | 0.0856 | 0.0016 |  | 509 | 106 |  | 524 | 19 |  | 529 | 9 |  | 99 |
| 12 | 169 |  | 356 |  | 0.47 |  | 0.0592 | 0.0016 |  | 0.6991 | 0.0193 |  | 0.0856 | 0.0010 |  | 572 | 55 |  | 538 | 12 |  | 529 | 6 |  | 98 |
| 13 | 152 |  | 238 |  | 0.64 |  | 0.0578 | 0.0020 |  | 0.6828 | 0.0256 |  | 0.0854 | 0.0012 |  | 520 | 80 |  | 528 | 15 |  | 528 | 7 |  | 99 |
| 14 | 148 |  | 322 |  | 0.46 |  | 0.0594 | 0.0021 |  | 0.7015 | 0.0250 |  | 0.0855 | 0.0011 |  | 583 | 78 |  | 540 | 15 |  | 529 | 7 |  | 97 |
| 15 | 131 |  | 237 |  | 0.55 |  | 0.0576 | 0.0022 |  | 0.6801 | 0.0256 |  | 0.0856 | 0.0012 |  | 522 | 83 |  | 527 | 15 |  | 530 | 7 |  | 99 |
| 16 | 78 |  | 162 |  | 0.48 |  | 0.0573 | 0.0026 |  | 0.6724 | 0.0250 |  | 0.0855 | 0.0015 |  | 506 | 72 |  | 522 | 15 |  | 529 | 9 |  | 98 |
| 17 | 110 |  | 215 |  | 0.51 |  | 0.0570 | 0.0019 |  | 0.6738 | 0.0224 |  | 0.0856 | 0.0013 |  | 500 | 74 |  | 523 | 14 |  | 530 | 8 |  | 98 |
| 18 | 204 |  | 365 |  | 0.56 |  | 0.0573 | 0.0018 |  | 0.6455 | 0.0221 |  | 0.0814 | 0.0013 |  | 506 | 72 |  | 506 | 14 |  | 510 | 8 |  | 99 |
| 19 | 194 |  | 294 |  | 0.66 |  | 0.0576 | 0.0020 |  | 0.6804 | 0.0219 |  | 0.0856 | 0.0014 |  | 522 | 74 |  | 527 | 13 |  | 530 | 8 |  | 99 |
| 20 | 514 |  | 421 |  | 1.22 |  | 0.0569 | 0.0017 |  | 0.6710 | 0.0197 |  | 0.0856 | 0.0014 |  | 487 | 67 |  | 521 | 12 |  | 529 | 8 |  | 98 |
| 21 | 77 |  | 155 |  | 0.50 |  | 0.0616 | 0.0028 |  | 0.7187 | 0.0337 |  | 0.0855 | 0.0027 |  | 661 | 100 |  | 550 | 20 |  | 529 | 16 |  | 96 |
| 22 | 156 |  | 273 |  | 0.57 |  | 0.0566 | 0.0018 |  | 0.6739 | 0.0218 |  | 0.0861 | 0.0013 |  | 476 | 69 |  | 523 | 13 |  | 533 | 8 |  | 98 |
| 23 | 135 |  | 248 |  | 0.55 |  | 0.0567 | 0.0023 |  | 0.6752 | 0.0305 |  | 0.0859 | 0.0013 |  | 480 | 91 |  | 524 | 18 |  | 531 | 8 |  | 98 |
| 24 | 111 |  | 199 |  | 0.56 |  | 0.0568 | 0.0028 |  | 0.6740 | 0.0308 |  | 0.0862 | 0.0016 |  | 487 | 109 |  | 523 | 19 |  | 533 | 9 |  | 98 |
| 190629-01 | | | | | | | | | | | | | | | | | | | | | | | | | |
| 1 | 62 |  | 228 |  | 0.27 |  | 0.0589 | 0.0023 |  | 0.6742 | 0.0256 |  | 0.0826 | 0.0010 |  | 565 | 88 |  | 523 | 16 |  | 512 | 6 |  | 97 |
| 2 | 174 |  | 467 |  | 0.37 |  | 0.0574 | 0.0015 |  | 0.6694 | 0.0181 |  | 0.0842 | 0.0011 |  | 509 | 56 |  | 520 | 11 |  | 521 | 7 |  | 99 |
| 3 | 46 |  | 199 |  | 0.23 |  | 0.0564 | 0.0023 |  | 0.6527 | 0.0250 |  | 0.0842 | 0.0013 |  | 478 | 89 |  | 510 | 15 |  | 521 | 8 |  | 97 |
| 4 | 75 |  | 220 |  | 0.34 |  | 0.0557 | 0.0022 |  | 0.6470 | 0.0274 |  | 0.0839 | 0.0014 |  | 439 | 89 |  | 507 | 17 |  | 519 | 8 |  | 97 |
| 5 | 32 |  | 126 |  | 0.25 |  | 0.0585 | 0.0026 |  | 0.6804 | 0.0314 |  | 0.0840 | 0.0014 |  | 546 | 94 |  | 527 | 19 |  | 520 | 8 |  | 98 |
| 6 | 75 |  | 310 |  | 0.24 |  | 0.0580 | 0.0023 |  | 0.6734 | 0.0282 |  | 0.0839 | 0.0015 |  | 532 | 87 |  | 523 | 17 |  | 520 | 9 |  | 99 |
| 7 | 153 |  | 373 |  | 0.41 |  | 0.0583 | 0.0023 |  | 0.6766 | 0.0254 |  | 0.0841 | 0.0015 |  | 543 | 89 |  | 525 | 15 |  | 521 | 9 |  | 99 |
| 8 | 98 |  | 223 |  | 0.44 |  | 0.0568 | 0.0024 |  | 0.6592 | 0.0294 |  | 0.0839 | 0.0012 |  | 483 | 94 |  | 514 | 18 |  | 519 | 7 |  | 99 |
| 9 | 75 |  | 310 |  | 0.24 |  | 0.0575 | 0.0022 |  | 0.6634 | 0.0287 |  | 0.0829 | 0.0014 |  | 535 | 87 |  | 521 | 17 |  | 521 | 9 |  | 99 |
| 10 | 110 |  | 373 |  | 0.29 |  | 0.0577 | 0.0017 |  | 0.6686 | 0.0197 |  | 0.0839 | 0.0011 |  | 517 | 68 |  | 520 | 12 |  | 519 | 6 |  | 99 |
| 11 | 119 |  | 413 |  | 0.29 |  | 0.0591 | 0.0015 |  | 0.6847 | 0.0160 |  | 0.0841 | 0.0009 |  | 569 | 56 |  | 530 | 10 |  | 520 | 6 |  | 98 |
| 12 | 192 |  | 399 |  | 0.48 |  | 0.0582 | 0.0020 |  | 0.6753 | 0.0258 |  | 0.0839 | 0.0012 |  | 600 | 78 |  | 524 | 16 |  | 519 | 7 |  | 99 |
| 13 | 68 |  | 232 |  | 0.29 |  | 0.0608 | 0.0024 |  | 0.7290 | 0.0307 |  | 0.0866 | 0.0015 |  | 632 | 88 |  | 556 | 18 |  | 535 | 9 |  | 96 |
| 14 | 133 |  | 425 |  | 0.31 |  | 0.0575 | 0.0019 |  | 0.6674 | 0.0227 |  | 0.0839 | 0.0008 |  | 509 | 74 |  | 519 | 14 |  | 520 | 5 |  | 99 |
| 15 | 41 |  | 190 |  | 0.21 |  | 0.0590 | 0.0020 |  | 0.6856 | 0.0247 |  | 0.0839 | 0.0011 |  | 565 | 69 |  | 530 | 15 |  | 519 | 7 |  | 97 |
| 16 | 32 |  | 126 |  | 0.25 |  | 0.0575 | 0.0026 |  | 0.6839 | 0.0214 |  | 0.0843 | 0.0015 |  | 556 | 94 |  | 524 | 19 |  | 521 | 8 |  | 98 |
| 17 | 60 |  | 212 |  | 0.28 |  | 0.0561 | 0.0020 |  | 0.6731 | 0.0256 |  | 0.0866 | 0.0015 |  | 457 | 78 |  | 523 | 16 |  | 535 | 9 |  | 97 |
| 18 | 131 |  | 484 |  | 0.27 |  | 0.0567 | 0.0013 |  | 0.6583 | 0.0184 |  | 0.0839 | 0.0014 |  | 480 | 50 |  | 514 | 11 |  | 520 | 8 |  | 98 |
| 19 | 52 |  | 196 |  | 0.26 |  | 0.0588 | 0.0019 |  | 0.6785 | 0.0222 |  | 0.0839 | 0.0012 |  | 561 | 72 |  | 526 | 13 |  | 519 | 7 |  | 98 |
| 20 | 104 |  | 399 |  | 0.26 |  | 0.0571 | 0.0017 |  | 0.6597 | 0.0187 |  | 0.0838 | 0.0012 |  | 494 | 67 |  | 514 | 11 |  | 519 | 7 |  | 99 |
| 21 | 42 |  | 165 |  | 0.25 |  | 0.0561 | 0.0021 |  | 0.6539 | 0.0275 |  | 0.0842 | 0.0013 |  | 454 | 116 |  | 511 | 17 |  | 521 | 7 |  | 98 |
| 22 | 51 |  | 234 |  | 0.22 |  | 0.0562 | 0.0023 |  | 0.6546 | 0.0289 |  | 0.0842 | 0.0012 |  | 457 | 91 |  | 511 | 18 |  | 521 | 7 |  | 98 |
| 23 | 81 |  | 362 |  | 0.22 |  | 0.0582 | 0.0015 |  | 0.6761 | 0.0192 |  | 0.0841 | 0.0008 |  | 600 | 59 |  | 524 | 12 |  | 520 | 5 |  | 99 |
| 24 | 54 |  | 254 |  | 0.21 |  | 0.0587 | 0.0021 |  | 0.6821 | 0.0247 |  | 0.0841 | 0.0010 |  | 567 | 78 |  | 528 | 15 |  | 521 | 6 |  | 98 |
| 25 | 30 |  | 118 |  | 0.26 |  | 0.0583 | 0.0033 |  | 0.6711 | 0.0367 |  | 0.0839 | 0.0015 |  | 539 | 122 |  | 521 | 22 |  | 519 | 9 |  | 99 |
| 26 | 74 |  | 325 |  | 0.23 |  | 0.0595 | 0.0021 |  | 0.6873 | 0.0243 |  | 0.0841 | 0.0016 |  | 583 | 78 |  | 531 | 15 |  | 521 | 9 |  | 98 |
| 190629-07 | | | | | | | | | | | | | | | | | | | | | | | | | |
| 1 | 43 |  | 156 |  | 0.28 |  | 0.0576 | 0.0034 |  | 0.6847 | 0.0384 |  | 0.0859 | 0.0013 |  | 517 | 85 |  | 530 | 23 |  | 532 | 8 |  | 99 |
| 2 | 34 |  | 128 |  | 0.27 |  | 0.0594 | 0.0024 |  | 0.7059 | 0.0293 |  | 0.0858 | 0.0016 |  | 583 | 119 |  | 542 | 17 |  | 531 | 9 |  | 99 |
| 3 | 40 |  | 189 |  | 0.21 |  | 0.0566 | 0.0027 |  | 0.6742 | 0.0368 |  | 0.0857 | 0.0015 |  | 476 | 106 |  | 523 | 22 |  | 530 | 9 |  | 97 |
| 4 | 51 |  | 166 |  | 0.31 |  | 0.0596 | 0.0029 |  | 0.7054 | 0.0355 |  | 0.0857 | 0.0015 |  | 587 | 92 |  | 542 | 21 |  | 530 | 9 |  | 98 |
| 5 | 56 |  | 252 |  | 0.22 |  | 0.0578 | 0.0017 |  | 0.6853 | 0.0206 |  | 0.0858 | 0.0009 |  | 520 | 67 |  | 530 | 12 |  | 531 | 5 |  | 98 |
| 6 | 71 |  | 191 |  | 0.37 |  | 0.0564 | 0.0026 |  | 0.6638 | 0.0328 |  | 0.0858 | 0.0031 |  | 478 | 104 |  | 517 | 20 |  | 530 | 9 |  | 99 |
| 7 | 27 |  | 122 |  | 0.22 |  | 0.0575 | 0.0043 |  | 0.6816 | 0.0534 |  | 0.0857 | 0.0016 |  | 522 | 94 |  | 528 | 32 |  | 530 | 10 |  | 99 |
| 8 | 43 |  | 192 |  | 0.22 |  | 0.0567 | 0.0027 |  | 0.6725 | 0.0329 |  | 0.0856 | 0.0012 |  | 480 | 106 |  | 522 | 20 |  | 530 | 7 |  | 99 |
| 9 | 105 |  | 249 |  | 0.42 |  | 0.0573 | 0.0021 |  | 0.6759 | 0.0237 |  | 0.0856 | 0.0010 |  | 502 | 81 |  | 524 | 14 |  | 529 | 6 |  | 99 |
| 10 | 65 |  | 158 |  | 0.41 |  | 0.0558 | 0.0022 |  | 0.6544 | 0.0266 |  | 0.0849 | 0.0012 |  | 443 | 87 |  | 511 | 16 |  | 525 | 7 |  | 98 |
| 11 | 85 |  | 234 |  | 0.36 |  | 0.0586 | 0.0026 |  | 0.6896 | 0.0282 |  | 0.0855 | 0.0014 |  | 554 | 101 |  | 533 | 17 |  | 529 | 8 |  | 98 |
| 12 | 80 |  | 207 |  | 0.39 |  | 0.0573 | 0.0026 |  | 0.6810 | 0.0437 |  | 0.0857 | 0.0032 |  | 502 | 100 |  | 527 | 26 |  | 530 | 11 |  | 99 |
| 13 | 65 |  | 278 |  | 0.23 |  | 0.0587 | 0.0020 |  | 0.6935 | 0.0236 |  | 0.0856 | 0.0015 |  | 567 | 72 |  | 535 | 14 |  | 529 | 9 |  | 99 |
| 14 | 39 |  | 192 |  | 0.20 |  | 0.0583 | 0.0029 |  | 0.6889 | 0.0333 |  | 0.0856 | 0.0013 |  | 539 | 94 |  | 532 | 20 |  | 529 | 8 |  | 99 |
| 15 | 35 |  | 156 |  | 0.22 |  | 0.0566 | 0.0027 |  | 0.6497 | 0.0322 |  | 0.0829 | 0.0012 |  | 476 | 112 |  | 508 | 20 |  | 513 | 7 |  | 98 |
| 16 | 91 |  | 214 |  | 0.42 |  | 0.0591 | 0.0034 |  | 0.6991 | 0.0387 |  | 0.0855 | 0.0015 |  | 572 | 89 |  | 538 | 23 |  | 529 | 9 |  | 97 |
| 17 | 158 |  | 442 |  | 0.36 |  | 0.0575 | 0.0016 |  | 0.6811 | 0.0178 |  | 0.0856 | 0.0011 |  | 522 | 61 |  | 527 | 11 |  | 530 | 6 |  | 99 |
| 18 | 71 |  | 289 |  | 0.25 |  | 0.0584 | 0.0025 |  | 0.6898 | 0.0277 |  | 0.0857 | 0.0012 |  | 546 | 94 |  | 533 | 17 |  | 530 | 7 |  | 97 |
| ~~19~~ | ~~110~~ |  | ~~392~~ |  | ~~0.28~~ |  | ~~0.0626~~ | ~~0.0040~~ |  | ~~0.6036~~ | ~~0.0185~~ |  | ~~0.0725~~ | ~~0.0014~~ |  | ~~654~~ | ~~137~~ |  | ~~479~~ | ~~11~~ |  | ~~450~~ | ~~8~~ |  | ~~88~~ |
| 20 | 29 |  | 129 |  | 0.23 |  | 0.0565 | 0.0028 |  | 0.6665 | 0.0330 |  | 0.0854 | 0.0015 |  | 472 | 118 |  | 519 | 20 |  | 528 | 9 |  | 97 |
| 21 | 33 |  | 142 |  | 0.24 |  | 0.0585 | 0.0027 |  | 0.6914 | 0.0309 |  | 0.0856 | 0.0012 |  | 550 | 106 |  | 534 | 19 |  | 529 | 7 |  | 99 |
| 22 | 97 |  | 281 |  | 0.35 |  | 0.0565 | 0.0018 |  | 0.6747 | 0.0237 |  | 0.0859 | 0.0012 |  | 472 | 36 |  | 524 | 14 |  | 531 | 7 |  | 98 |
| Note: Con. = 1-(|(207Pb/235U-206Pb/238U)age|/ (206Pb/238U)age) | | | | | | | | | | | | | | | | | | | | | | | | | |
